# Supplementary material for: Identifying resurrection genes through the differentially expressed genes between Selaginella tamariscina (Beauv.) spring and Selaginella moellendorffii Hieron under drought stress
Source: PLoS One. 2019 Nov 13;14(11):e0224765. doi: 10.1371/journal.pone.0224765 (PMC6853609; doi:10.1371/journal.pone.0224765)
Supplement: S7 Table — (XLSX) [file pone.0224765.s008.xlsx]

## Sheet: TF families of St
TF_family	Gene Number
AP2/ERF	9
C2C2	1
E2F/DP	1
EIL	1
GRAS	3
HB	1
LBD (AS2/LOB)	1
MYB	4
MYB_related	1
NAC	4
SBP	1
WRKY	1

## Sheet: TF families of Sm
TF_family	Gene Number
ERF	19
bHLH	10
WRKY	9
NAC	6
GRAS	3
bZIP	3
Trihelix	2
Dof	2
EIL	2
MYB	2
GATA	2
C3H	1
AP2	1
LBD	1
SBP	1
E2F/DP	1
GRF	1
CAMTA	1
HD-ZIP	1
